# Supplementary material
Source: Research Square preprint supplement (doi:10.21203/rs.3.rs-10029864/v2)
Supplement: Supplementary file 1 [file 1ca7f31be3669a78268bc8c7.docx]

**SUPPLEMENTARY MATERIAL**

*Postoperative C-reactive protein for detecting anastomotic leakage after elective laparoscopic colorectal resection: a prospective cohort study*

**Supplementary Table 1. Diagnostic performance of postoperative CRP in patients with protective diverting stomas**

| **A. Any anastomotic leakage in patients with protective diverting stomas (A+B+C)** | | | | | | | | | |
| --- | --- | --- | --- | --- | --- | --- | --- | --- | --- |
| **POD** | **n** | **Events** | **AUC (95% CI)** | **Threshold** | **Sensitivity (95% CI)** | **Specificity (95% CI)** | **NPV (95% CI)** | **LR+** | **LR−** |
| POD2 | 37 | 8 | 0.621 (0.348–0.860) | 133.2 mg/L | 62.5 (30.6–86.3) | 65.5 (47.3–80.1) | 86.4 (66.7–95.3) | 1.81 | 0.57 |
| POD3† | 17 | 5 | 0.575 (0.248–0.904) | 225.8 mg/L | 40.0 (11.8–76.9) | 83.3 (55.2–95.3) | 76.9 (49.7–91.8) | 2.40 | 0.72 |
| POD4 | 40 | 10 | 0.810 (0.605–0.970) | 186.7 mg/L | 80.0 (49.0–94.3) | 86.7 (70.3–94.7) | 92.9 (77.4–98.0) | 6.00 | 0.23 |
| **B. Invasive or surgical anastomotic leakage in patients with protective diverting stomas (B+C)** | | | | | | | | | |
| **POD** | **n** | **Events** | **AUC (95% CI)** | **Threshold** | **Sensitivity (95% CI)** | **Specificity (95% CI)** | **NPV (95% CI)** | **LR+** | **LR−** |
| POD2 | 37 | 6 | 0.565 (0.206–0.914) | 315.0 mg/L | 33.3 (9.7–70.0) | 100.0 (89.0–100.0) | 88.6 (74.0–95.5) | — | 0.67 |
| POD3† | 17 | 3 | 0.464 (0.000–1.000) | 404.5 mg/L | 33.3 (6.1–79.2) | 92.9 (68.5–98.7) | 86.7 (62.1–96.3) | 4.67 | 0.72 |
| POD4 | 40 | 6 | 0.681 (0.381–0.926) | 250.7 mg/L | 66.7 (30.0–90.3) | 82.4 (66.5–91.7) | 93.3 (78.7–98.2) | 3.78 | 0.40 |

*† POD3 analyses were restricted to the available subset and should be considered exploratory. AL = anastomotic leakage; AUC = area under the curve; CI = confidence interval; CRP = C-reactive protein; LR = likelihood ratio; NPV = negative predictive value; POD = postoperative day.*

**Supplementary Table 2. Anastomotic leakage rates and postoperative day 4 C-reactive protein according to anastomosis type and construction technique**

| **Subgroup** | **n** | **Anastomotic leakage, n (%)** | **POD4 CRP, median (IQR), mg/L** |
| --- | --- | --- | --- |
| **By anastomosis type** | | | |
| Ileocolic | 161 | 20 (12.4) | 71.6 (38.5–155.7) |
| Colorectal | 186 | 30 (16.1) | 58.2 (31.7–134.3) |
| **By construction technique** | | | |
| Mechanical / stapled | 203 | 31 (15.3) | 60.1 (33.8–136.7) |
| Hand-sewn | 144 | 19 (13.2) | 65.9 (38.0–143.3) |
| **By anastomosis type and technique** | | | |
| Ileocolic, mechanical | 53 | 7 (13.2) | 78.8 (46.0–165.6) |
| Ileocolic, hand-sewn | 108 | 13 (12.0) | 65.7 (36.5–143.1) |
| Colorectal, mechanical | 150 | 24 (16.0) | 52.8 (28.1–134.1) |
| Colorectal, hand-sewn | 36 | 6 (16.7) | 71.4 (39.4–141.5) |

*Descriptive cohort (n = 347; ileocolic and colorectal anastomoses; ileoanal/coloanal anastomoses excluded). Percentages are calculated within each subgroup. POD4 CRP medians were computed among patients with an available POD4 measurement. CRP, C-reactive protein; IQR, interquartile range; POD, postoperative day.*
